# Supplementary material for: Precision Assembly of Complex Cellular Microenvironments using Holographic Optical Tweezers
Source: PubMed Central journal article supplement (PMC4341216; doi:10.1038/srep08577), 2015-02-26
Supplement: srep08577-s1.pdf [file srep08577-s1.pdf]

# Precision Assembly of Complex Cellular Microenvironments using Holographic Optical Tweezers

(supplementary information)

Glen R Kirkham<sup>1</sup>, Emily Britchford<sup>1</sup>, Thomas Upton<sup>1</sup>, James Ware<sup>1</sup>, Graham M Gibson<sup>2</sup>, Yannick Devaud<sup>3</sup>, Martin Ehrbar<sup>3</sup>, Miles Padgett<sup>2</sup>, Stephanie Allen<sup>1</sup>, Lee D Buttery<sup>1</sup> and Kevin Shakesheff<sup>1</sup>

<sup>1</sup>School of Pharmacy, University of Nottingham, Nottingham, NG7 2RD, UK

<sup>2</sup>School of Physics and Astronomy, University of Glasgow, Glasgow, G12 8QQ, UK

<sup>3</sup>Department of Obstetrics, University Hospital Zurich, 8091 Zurich, Switzerland

## Supplementary Figures

Supplementary Figure 1. A. Schematic of the holographic optical tweezers system. A 1064 nm laser is expanded to fill an SLM, displaying computer controlled holograms which are used to generate multiple trapping beams. The beams are coupled into the microscope using a polarizing beamsplitter enabling the generation of multiple optical traps in 3D within the sample. B. A schematic of the support systems installed on the microscope stage to maintain optimal cellular function during and after patterning as well as provide cooling for temperature based gelation protocols. C. A diagrammatic representation of the *in situ* use of an avidin-biotin method (I) and two hydrogel systems (II) used to stabilize cellular architectures after optical tweezers based micromanipulation.

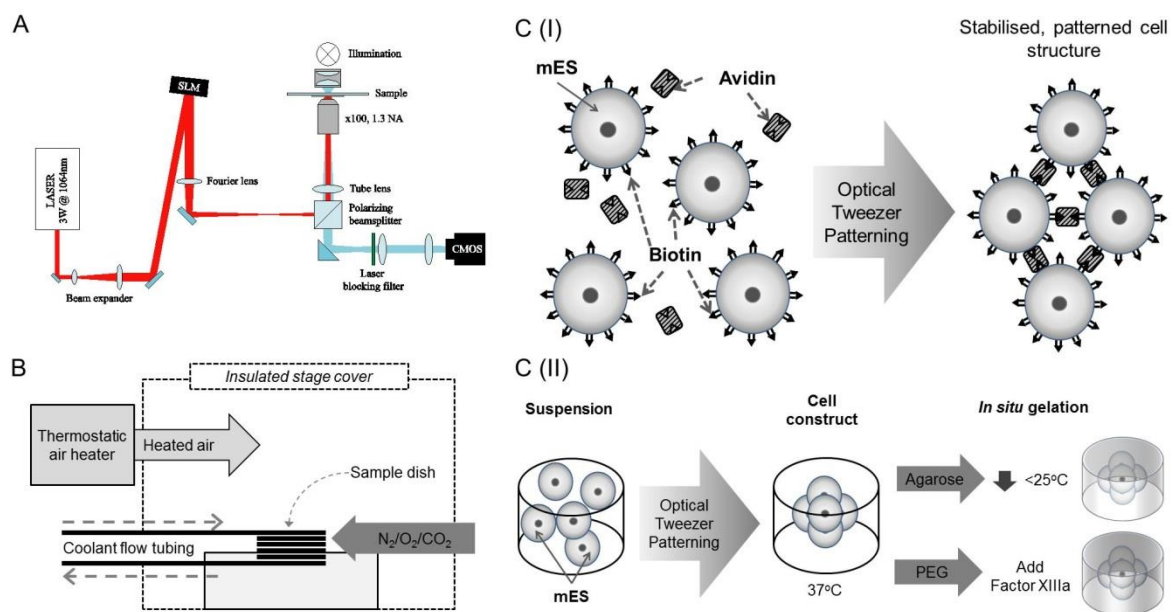

Supplementary Figure 2. PLGA polymer microparticle size distribution, determined by use of a Coulter counter for both blue (A) and green (B) Calcein-AM loaded batches.

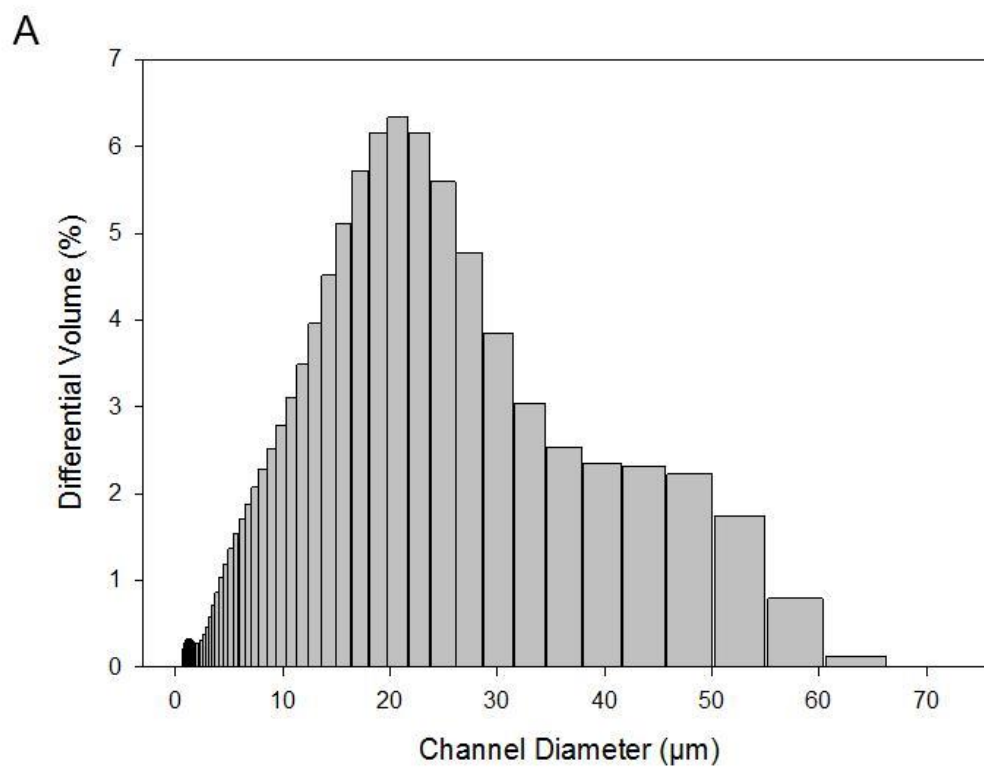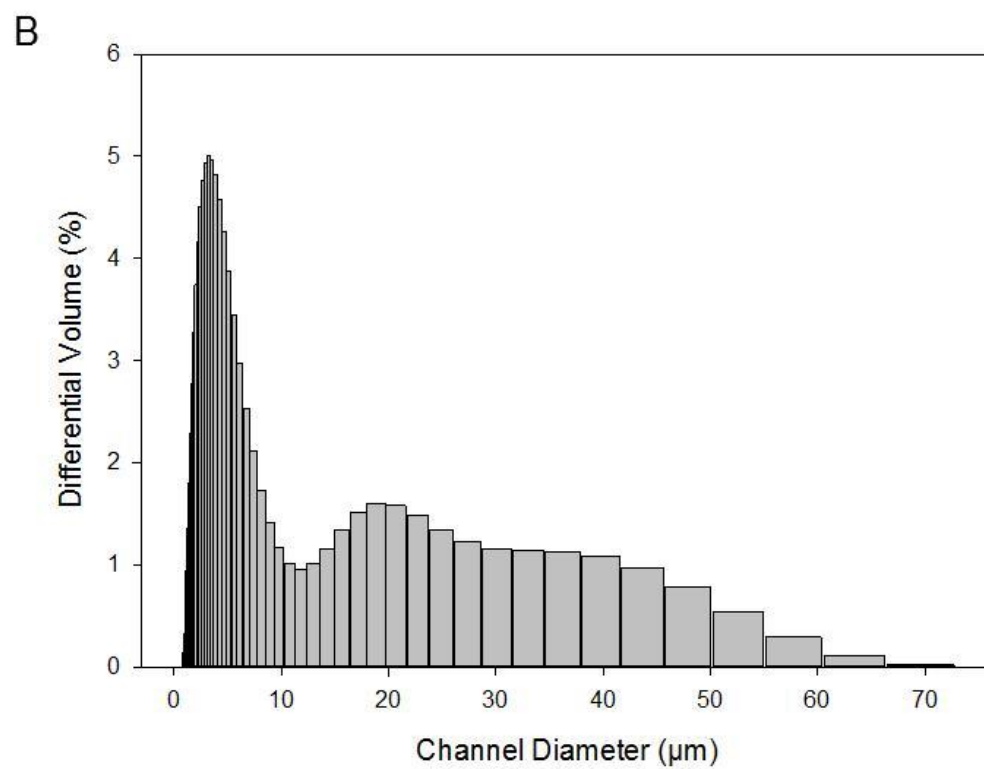

Supplementary Figure 3. Viability of mouse embryonic stem cells assessed using a fluorescent live/dead stain: A. After construction into six cell ring structures and exposure to holographic optical tweezers based trapping of 10, 20 and 30 minute durations. Scale bars = 12  $\mu\text{m}$ . B. After construction into six cell ring structures but with no additional trapping exposures. Scale bars = 12 $\mu\text{m}$ . C. Cells not patterned and not exposed to any form of optical trapping or laser energies. Scale bars = 85 $\mu\text{m}$ . Images in A, B and C were taken 1 hour after patterning procedures.

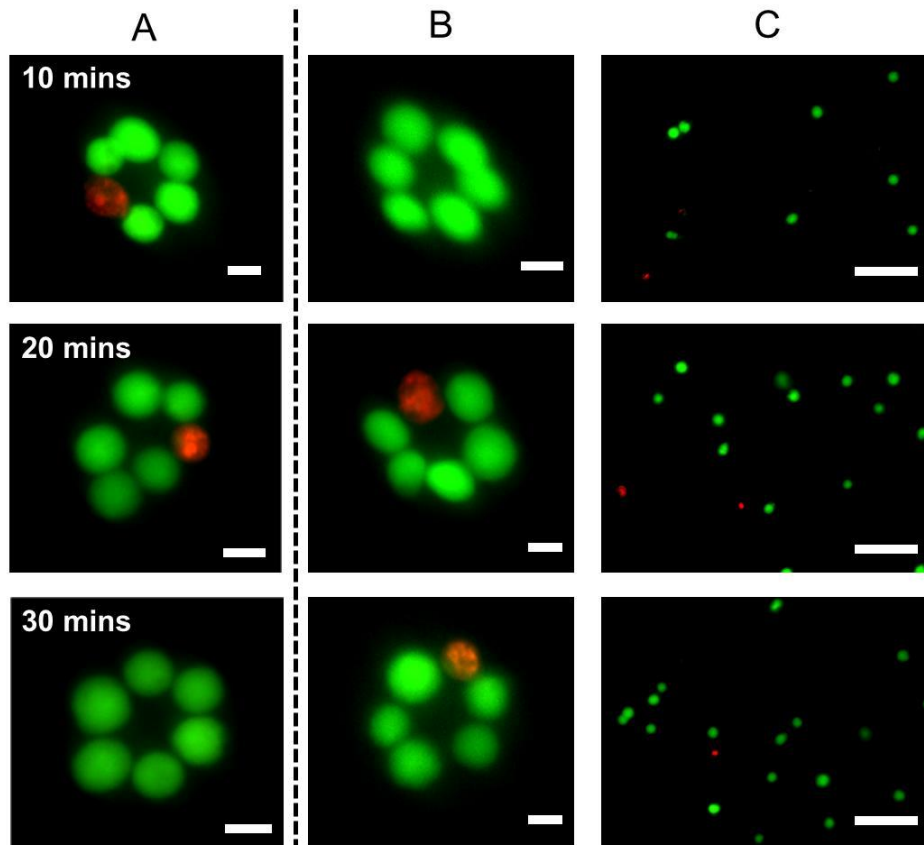

Supplementary Movie 1. Micromanipulation of mouse embryonic stem cells suspended in medium using a holographic optical tweezers micromanipulation technique. The movie shows three distinct patterning experiments that were sequentially integrated into a single avi file. The speed of this sequence was increased by a factor of three.

Supplementary Movie 2. A 3D reconstructed confocal microscope projection of 66 mouse embryonic stem cells positioned into a predetermined structure using a holographic optical tweezers micromanipulation technique. The cells were labeled with Calcein-AM green prior to patterning and the structure stabilized by the initial use of avidin-biotin and the subsequent gelation of a PEG based modular hydrogel.
